# Supplementary material for: High Transient-Thermal-Shock Resistant Nanochannel Tungsten Films
Source: MDPI journal article supplement (doi:10.3390/nano11102663), 2021-10-11
Supplement: s1 [file s1]

# High Transient-Thermal-Shock Resistant Nanochannel Tungsten Films

Tao Cheng <sup>1,†</sup>, Wenjing Qin <sup>1,2,†</sup>, Youyun Lian <sup>3,\*</sup>, Xiang Liu <sup>3</sup>, Jun Tang <sup>1</sup>, Guangxu Cai <sup>1</sup>, Shijian Zhang <sup>4</sup>, Xiaoyun Le <sup>4,\*</sup>, Changzhong Jiang <sup>1</sup> and Feng Ren <sup>1,\*</sup>

<sup>1</sup> School of Physics and Technology, Center for Ion Beam Application, Hubei Nuclear Solid Physics Key Laboratory and MOE Key Laboratory of Artificial Micro- and Nano-Structures, Wuhan University, Wuhan 430072, China; juntang@whu.edu.cn (J.T.); jyk@whu.edu.cn (G.C.); czjiang@whu.edu.cn (C.J.)

<sup>2</sup> School of Physics and Electronics, Key Laboratory of Low Dimensional Quantum Structures and Quantum Control, Hunan Normal University, Changsha 410081, China

<sup>3</sup> Fusion Reactor Design & Material Division, Southwestern Institute of Physics, Chendu 610041, China; xliu@swip.ac.cn (X.L.)

<sup>4</sup> School of Physics, Beihang University, Beijing 100191, China; zhangsj@buaa.edu.cn (S.Z.)

<sup>†</sup> Co-first author: tcheng@whu.edu.cn (T.C.); qwj@hunnu.edu.cn (W.Q.)

\* Correspondence: authors email: lianyy@swip.ac.cn (Y.L.); xyle@buaa.edu.cn (X.L.); fren@whu.edu.cn (F.R.)

## Supporting Figures

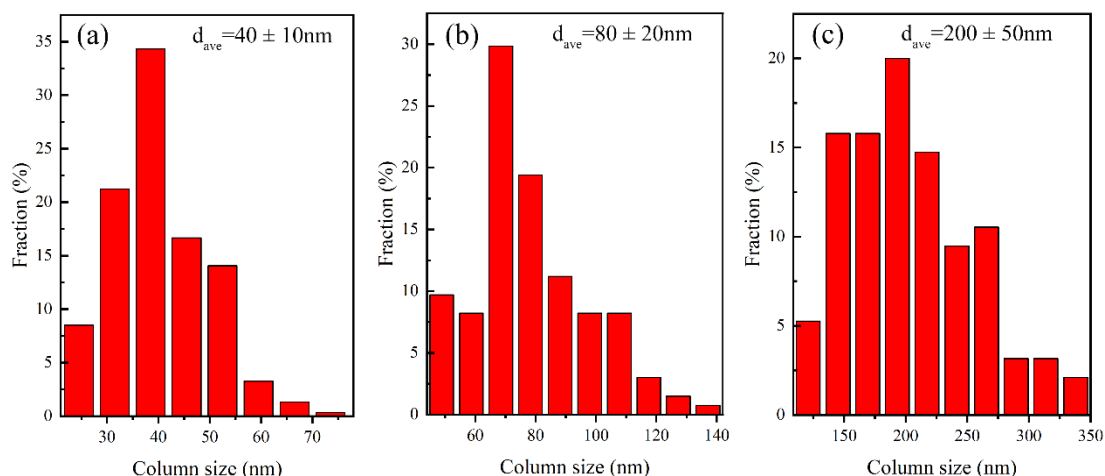

**Figure S1.** Statistical results of the average column size of nanochannel films W-150W-1 (a), W-50W-1 (b), W-150W-10 (c), respectively.

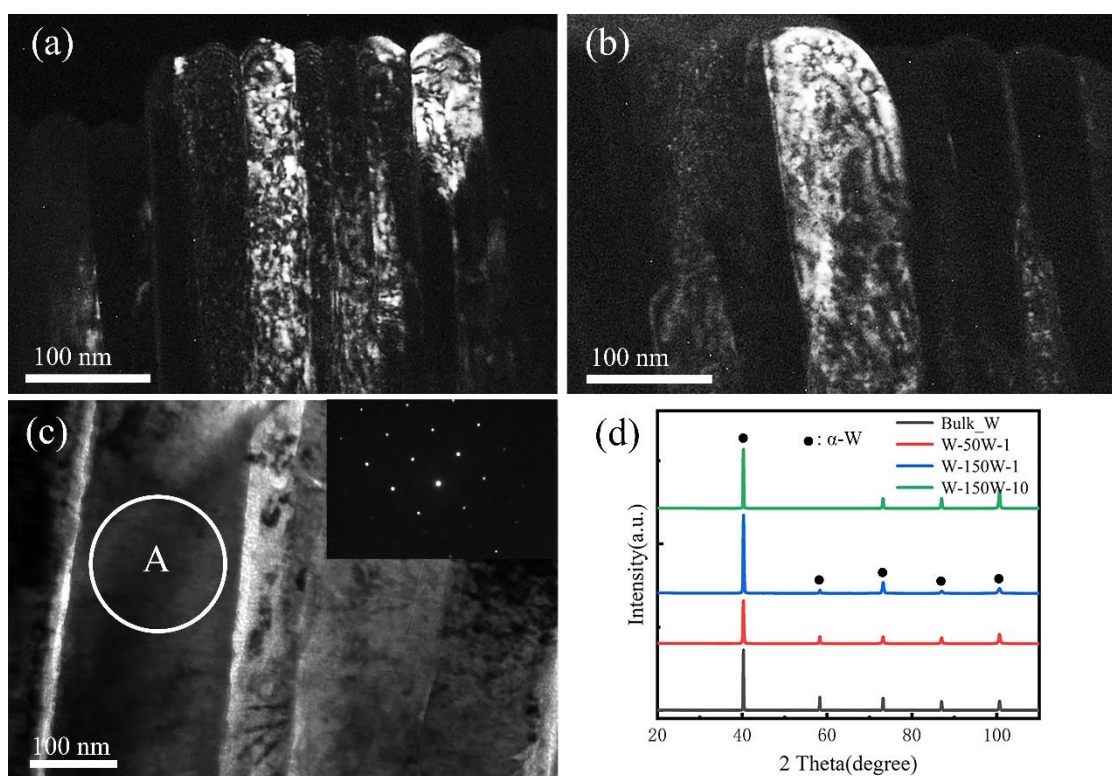

**Figure S2.** The dark-field XTEM image of the W-150W-1 (a) and W-50W-1 (b) film; The bright-field XTEM images of the W-150W-10 film (c), insert show the electron diffraction in region A; (d) is the corresponding GIXRD image.

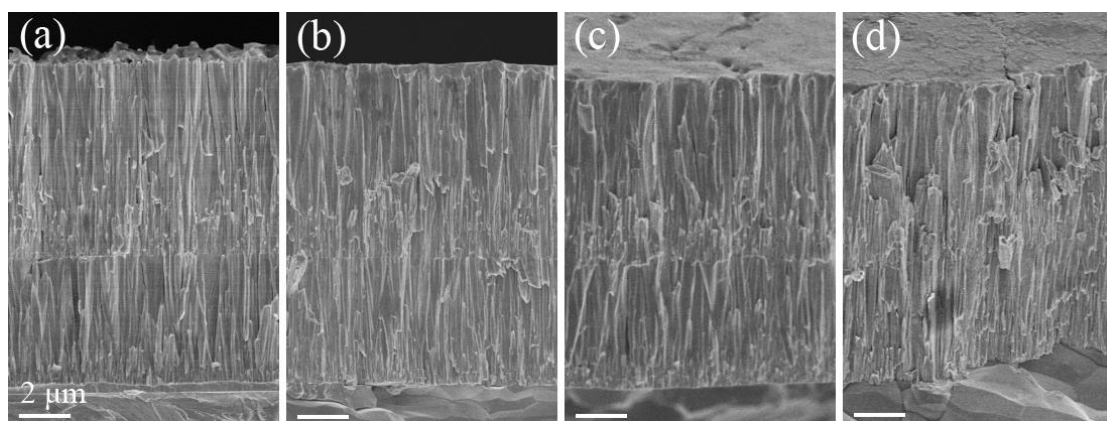

**Figure S3.** The SEM images of the W-150W-10 film irradiated by HIPIB with the energy density of 1 J/cm<sup>2</sup> and the pulses of 0 (a), 10 (b), 50 (c) and 100 (d), respectively. The corresponding scale is uniform.

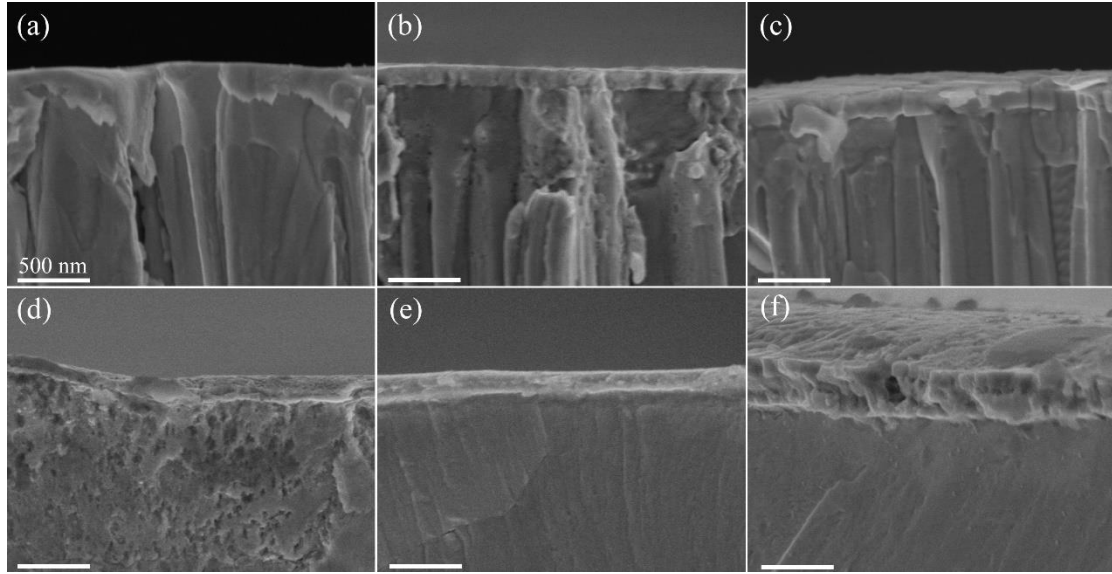

**Figure S4.** The SEM images of the W-150W-10 film and bulk W irradiated by HIPIB; (a), (b) and (c) are the irradiated W-150W-10 film and (d), (e) and (f) are the irradiated bulk W with the energy density of 1 J/cm<sup>2</sup> and the pulses of 10, 50 and 100, respectively. The corresponding scale is uniform.

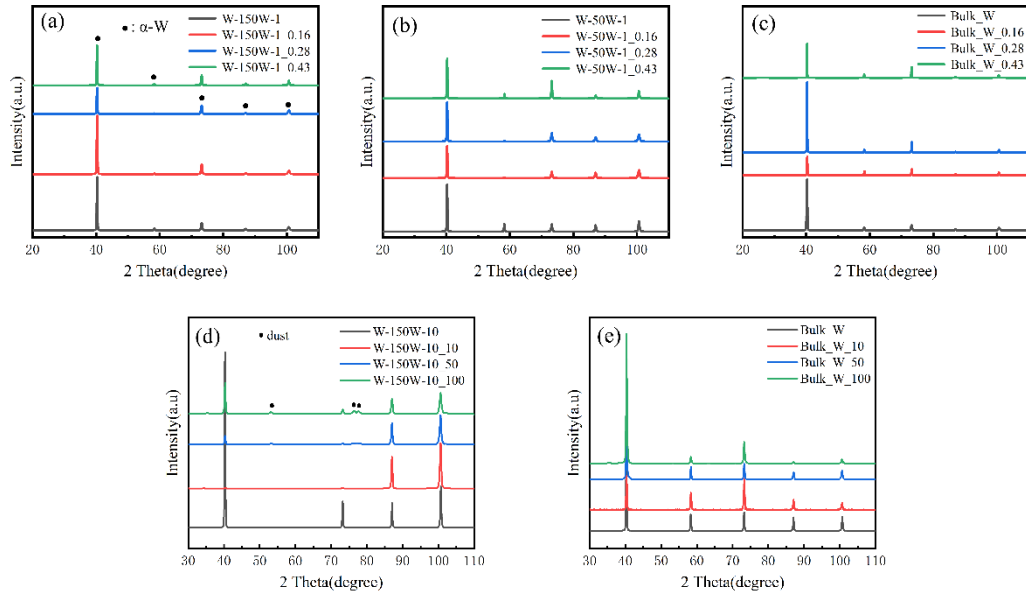

**Figure S5.** The GIXRD patterns of all samples. The W-150W-1 (a), W-50W-1 (b) films, and bulk W (c) irradiated by pulsed electron beam with the absorbed power density of 0.16, 0.28 and 0.43 GW/m<sup>2</sup>, respectively; the W-150W-10 film (d) and the bulk W (e) irradiated by HIPIB with the energy density of 1 J/cm<sup>2</sup>, respectively. All samples are performed with an angle of incidence  $\alpha = 5^\circ$ .
